# Supplementary material
Source: publisher site journal article supplement (https://static.cambridge.org/content/id/urn:cambridge.org:id:article:S0033822220000132/resource/name/S0033822220000132supp001.docx)
Supplement: Supplementary file 1 [file S0033822220000132supp001.docx]

Supporting information for

**Radiocarbon dating of small sized foraminifer samples: insights into marine sediment mixing**

**L. Missiaen1,2*, L. Wacker3, B.C. Lougheed1,4, L. Skinner5, I. Hajdas3, J. Nouet6, S. Pichat7,8,1, C. Waelbroeck1**

1Laboratoire des Sciences du Climat et de l’Environnement, LSCE/IPSL, CEA-CNRS-UVSQ-Université Paris-Saclay, F-91198 Gif-sur-Yvette, France.

2Climate Change Research Centre, University of New South Wales, Sydney, Australia

3Laboratory of Ion Beam Physics, ETH Zürich, 8093 Zürich, Switzerland

4Department of Earth Sciences, Uppsala University, Uppsala, Sweden

5 Godwin Laboratory for Palaeoclimate Research, Department of Earth Sciences, University of Cambridge, Cambridge CB2 3EQ, United Kingdom

6Université Paris Sud – Paris Saclay, UMR-CNRS GEOPS 8148, Bât. 504, Rue du Belvédère, 91405 Orsay, France

7Université de Lyon, ENS de Lyon, Laboratoire de Géologie de Lyon (LGL-TPE), F-69007 Lyon, France

8Climate Geochemistry Department, Max Planck Institute for Chemistry, Mainz, Germany.

**Contents of this file**

Text S1 to S3

Figures S1 to S4

Tables S1 to S4

This supporting information file contains 3 supplementary texts detailing the measurements of REE concentrations and the calculation of the Ce anomaly (Text S1), technical aspect of SEM pictures acquisition (Text S2) and the procedure followed for benthic δ13C (and δ18O) measurements (Text S3). It also contains 4 supplementary figures showing correlation between gas and graphite measurements (Figure S1), SU90-08 REE patterns normalized to PAAS and downcore Eu anomaly (Figure S2), selected SEM pictures of benthic and planktonic specimens (Figure S3) and the radiocarbon data screening through the leaching test (Figure S4). Finally, it contains 4 Tables showing the standard material radiocarbon measurements (Table S1), SU90-08 radiocarbon values measured in this study (Table S2), the standard deviations between the gas and graphite samples (Table S3) and SU90-08 benthic δ13C and δ18O values measured in this study (Table S4).

**Text S1: Rare Earth Elements (REE) concentration measurements of foraminifer shell coatings in SU90-08.**

REE concentrations offoraminifer shell coatings were measured by laser ablation in 16 sediments levels of core SU90-08 following the method detailed in (Skinner et al. 2019). For each level, a dozen of planktonic foraminifer specimens (G.*bulloides*) were selected and prepared for laser ablation analysis. The shells were disposed in a receptacle containing methanol and dissected into chambers using clean scalpel. The material was then washed for a few seconds in ultrasonic bath to remove the clay inside the chambers that could not have been removed across sediment sieving and foraminifer cleaning. Next, clean chamber fragments were disposed on carbon strips to expose the outer shell. REE concentrations of foraminifer shell coatings were measured at the Godwin Laboratory, using the ANALYTE G2 excimer laser coupled with Thermo ICap-Q ICP-MS. NIST612 standard was used to optimize the ICM-MS sensitivity. Data reduction, made with Iolite software, involves the subtraction of the background noise, internal standardization to 43Ca and external standardization using NIS612 standard. NIST614 standard is regularly run in between the samples in order to calibrate and correct the instrumental drift.

REE concentrations are normalized against Post Archean Australian Shale (PAAS) compositions (Pourmand et al. 2012) to remove the natural variations in absolute concentration and display the samples REE patterns (Figure S3.A). Note that normalizing the data against the PAAS values of Taylor and McLennan (1985) does not change the REE pattern. The analysis of the pattern permits to investigate the processes that could have occurred at the seawater-sediment interface (Skinner *et al.* 2019), notably the influence of hydrothermal fluid or seawater circulation on pore-water composition. To further check for these processes, anomalies relative to the neighboring elements have been defined (e.g. Tostevin et al. (2016)). We notably used the Eu anomaly as an indicator of hydrothermal fluid circulation and the Ce anomaly as an indicator of redox conditions. These anomalies were calculated as follow (Tostevin et al. 2016):

Eu/Eu* = 2xEuPAAS/(SmPAAS + GdPAAS)

Ce/Ce* = 2xCePAAS/(LaPAAS + PrPAAS)

where the subscript PAAS indicates a normalization to the PAAS value of (Pourmand et al. 2012).

The SU90-08 Eu and Ce anomaly records are presented in Figure S3B and Figure 4, respectively.

**Text S2: SEM pictures of SU90-08 benthic and planktonic foraminifers**

Four or five benthic and planktonic foraminifera shells from eight SU90-08 depth levels were picked and mounted on a cone using double-sided carbon tape. Then they were coated using a E5100 (Polaron) cool sputter coater equipped with a Au/Pd target. Scanning Electron Microscopy (SEM) observations were carried out on a Pro X (Phenom) bench microscope, equipped with a Back-Scattered Electron Detector (BSE) and operated at 10 keV and 3 mm working distance. A selection of the SEM images obtained is shown in Figure S4.

**Text S3: Benthic δ13C and δ18O measurements**

Epifaunal benthic foraminifers of the *Cibicides wuellerstorfi* species were handpicked in the >150 m size fraction every 2 cm. Core SU90-08 *C. wuellerstorfi* 13C/12C and 18O/16O (respectively 13C and 18O, expressed in ‰ versus Vienna Pee-Dee Belemnite, VPDB) were measured at the LSCE on Finnigan ∆+ and Elementar Isoprime mass spectrometers on samples of 1 to 3 specimens. VPDB is defined with respect to NBS-19 calcite standard (18O = -2.20 ‰ and 13C = +1.95 ‰). The mean external reproducibility (1σ) of carbonate standards is ± 0.03 ‰ for 13C; measured NBS-18 18O is -23.27 ± 0.10 and 13C is -5.01 ± 0.03 ‰ VPDB. The results are presented in Table S4.

**Figure S1: Correlation between gas and graphite ages**

**
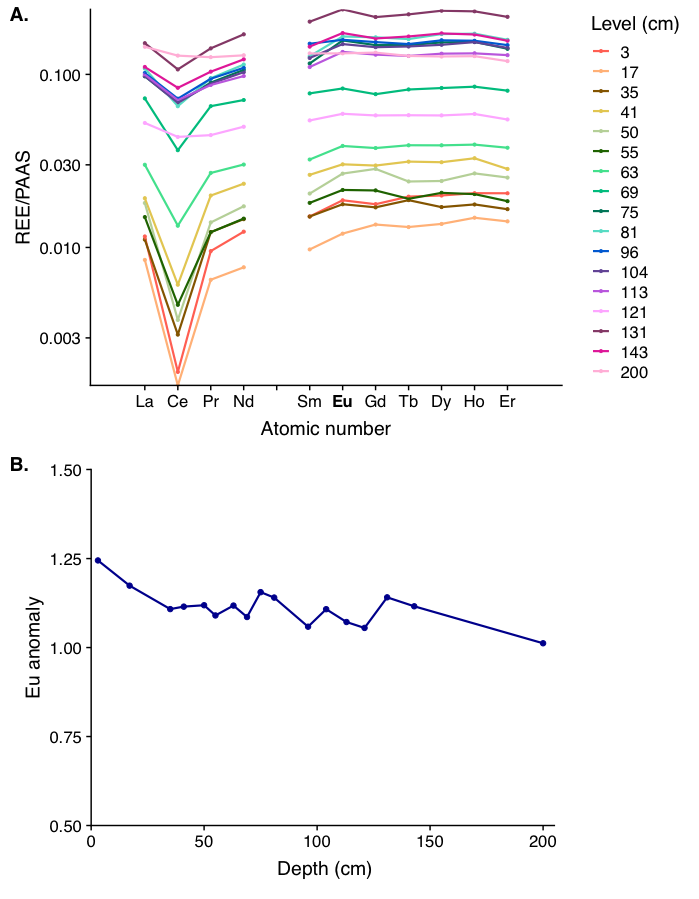
**

**Figure S2: SU90-08 REE Patterns. A.** Normalization against Post Archean Australian Shale (Pourmand et al. 2012) **B.** Downcore Eu anomaly (Eu/Eu*)

**A.**

**B.**

**Figure S3: SEM pictures of SU90-08 benthic (A.) and planktonic (B.) foraminifers**

a) 35-36 cm, b) 41-42 cm, c) 50-51 cm, d) 52-53 cm, e) 61-62 cm, f) 79-80 cm, g) 96-97 cm, h) 131-132 cm.

Planktonic foraminifers display some dissolution features as well as recrystallization of secondary calcite (especially in b) and f)). However, no drastic change in the foraminifer conservation is observed between the upper part of the core (0 to 65 cm) and the lower part of the core (65 to 135 cm).

**Figure S4: Leaching test.**

A. Benthic and planktonic analytical uncertainties as a function of the measured radiocarbon age for leach fraction (blue) and main fraction (red). The lines represent the exponential functions that best fit the measured analytical uncertainty

B. Expected (black line) and observed (symbols) age offsets between the main and leach fractions for benthic foraminifers (red) and planktonic foraminifera (blue).

The expected radiocarbon age offset between a leach and a main fraction of the same radiocarbon age is evaluated from Monte Carlo draws. For each given sample radiocarbon age, we randomly draw 10 000 pairs of main and leach fraction within a gaussian distribution defined by the considered radiocarbon age and the analytical uncertainties of the main and leach fraction respectively (Figure S5.A.). We then extract the mean age offset (black line), its variance (2σ - light green envelope) and its standard deviation (1σ - dark green envelope). The data is plotted against measured or theoretical radiocarbon age.

The red dashed lines define the accepted age offsets between main and leach fractions: the mean – 2σ for the lower limit and 3 times the mean + 1σ sigma for the upper limit (see text). The data points outside this range do not pass the leaching test (crosses).

**Table S1: Standard material radiocarbon measurements**

* indicates the background radiocarbon age on standard material (IAEA-C1) or foraminifer samples (monospecific G. *bulloides* or mixed benthic) hand-picked from SU90-08 sediments older than 260 ky, supposedly 14 C-free.

** the reported uncertainty corresponds to the quadratic propagation of the measured uncertainty and the uncertainty of standard material age

The consensus values are 0.9445 ± 0.0018 for CSTD, 0.4114 ± 0.0003 for IAEA-C2 and 0.0000 ± 0.0002 for IAEA-C1.

| **Material** | **Technique** | **Measured**  **F14 C** | **Uncertainty (1σ)** | **Age offset or background**  **(years)** | **Uncertainty**  **(1σ-years)** |
| --- | --- | --- | --- | --- | --- |
| CSTD | Gas | 0.9461 | 0.0074 | 14 | 63** |
| CSTD | Gas | 0.9287 | 0.0123 | 136 | 107** |
| CSTD | Gas | 0.9414 | 0.0083 | 26 | 71** |
| CSTD | Gas | 0.9371 | 0.0122 | 64 | 105** |
| IAEA-C2 | Gas | 0.4088 | 0.0040 | 52 | 80** |
| IAEA-C2 | Gas | 0.4170 | 0.0041 | 108 | 79** |
| IAEA-C2 | Gas | 0.4024 | 0.0045 | 177 | 91** |
| IAEA-C2 | Gas | 0.4305 | 0.0073 | 364 | 136** |
| IAEA-C2 | Gas | 0.4094 | 0.0045 | 38 | 89** |
| IAEA-C2 | Gas | 0.4277 | 0.0074 | 312 | 139** |
| IAEA-C1 | Gas | 0.0034 | 0.0005 | 45 662* | 1100 |
| IAEA-C1 | Gas | 0.0038 | 0.0005 | 44 764* | 1126 |
| IAEA-C1 | Gas | 0.0036 | 0.0006 | 45 136* | 1345 |
| IAEA-C1 | Gas | 0.0024 | 0.0004 | 48 369* | 1270 |
| IAEA-C1 | Gas | 0.0044 | 0.0005 | 43 645* | 940 |
| 14C-free benthics | Gas | 0.0053 | 0.0004 | 42 052* | 565 |
| 14C-free planktonics | Gas | 0.0050 | 0.0004 | 42 617* | 587 |
| IAEA-C2 | Graphite | 0.4130 | 0.00161 | 31 | 35** |
| IAEA-C1 | Graphite | 0.0028 | 0.00015 | 47 133* | 288 |
| IAEA-C1 | Graphite | 0.0026 | 0.00014 | 47 953* | 318 |
| IAEA-C1 | Graphite | 0.0026 | 0.00017 | 47 717* | 326 |
| IAEA-C1 | Graphite | 0.0024 | 0.00009 | 48 448* | 339 |
| IAEA-C1 | Graphite | 0.0024 | 0.00010 | 48 551* | 335 |
| IAEA-C1 | Graphite | 0.0029 | 0.00015 | 46 990* | 316 |
| 14C-free planktonics | Graphite | 0.0028 | 0.00009 | 47 147* | 691 |
| 14C-free planktonics | Graphite | 0.0032 | 0.00020 | 46 213* | 653 |

**Table S2: SU90-08 radiocarbon measurements**

| **Depth**  **(cm)** | **Lab code** | **Species** | **14C age (y)** | **1** | **Lab** | **Technique** |
| --- | --- | --- | --- | --- | --- | --- |
| 3 | UBA-36778 | Benthics | 3460 | 31 | 14C Chrono centre Belfast | Graphite |
| 3 | ETH-76334.1.1 | mixed benthic | 2783 | 56 | ETH-Zurich | Gas |
| 3 | ETH-76334.3.1 | mixed benthic | 3302 | 58 | ETH-Zurich | Gas |
| 3 | UBA-36779 | G.ruber | 3279 | 21 | 14C Chrono centre Belfast | Graphite |
| 3 | ETH-76333.1.1 | G.bulloides | 3407 | 61 | ETH-Zurich | Gas |
| 3 | ETH-76333.3.1 | G.bulloides | 3097 | 55 | ETH-Zurich | Gas |
| 5 | UBA-36781 | Benthics | 3289 | 22 | 14C Chrono centre Belfast | Graphite |
| 5 | UBA-36783 | G.ruber | 3619 | 21 | 14C Chrono centre Belfast | Graphite |
| 9 | UBA-36780 | Benthics | 3059 | 34 | 14C Chrono centre Belfast | Graphite |
| 9 | ETH-76336.1.1 | mixed benthic | 2763 | 69 | ETH-Zurich | Gas |
| 9 | UBA-36784 | G.ruber | 3527 | 21 | 14C Chrono centre Belfast | Graphite |
| 9 | ETH-76335.1.1 | G.bulloides | 3564 | 60 | ETH-Zurich | Gas |
| 9 | ETH-76335.3.1 | G.bulloides | 3319 | 56 | ETH-Zurich | Gas |
| 15 | UBA-36782 | Benthics | 4215 | 35 | 14C Chrono centre Belfast | Graphite |
| 15 | UBA-36785 | G.ruber | 4201 | 23 | 14C Chrono centre Belfast | Graphite |
| 17 | UBA-36787 | Benthics | 4391 | 24 | 14C Chrono centre Belfast | Graphite |
| 17 | ETH-76338.1.1 | mixed benthic | 4342 | 64 | ETH-Zurich | Gas |
| 17 | ETH-76338.3.1 | mixed benthic | 4842 | 64 | ETH-Zurich | Gas |
| 17 | UBA-36788 | G.ruber | 4447 | 29 | 14C Chrono centre Belfast | Graphite |
| 17 | ETH-76337.1.1 | G.bulloides | 4558 | 61 | ETH-Zurich | Gas |
| 17 | ETH-76337.3.1 | G.bulloides | 4760 | 62 | ETH-Zurich | Gas |
| 23 | UBA-36791 | Benthics | 5954 | 29 | 14C Chrono centre Belfast | Graphite |
| 23 | ETH-76340.1.1 | mixed benthic | 5373 | 64 | ETH-Zurich | Gas |
| 23 | ETH-76340.3.1 | mixed benthic | 6651 | 69 | ETH-Zurich | Gas |
| 23 | UBA-36789 | G.ruber | 5601 | 26 | 14C Chrono centre Belfast | Graphite |
| 23 | ETH-76339.1.1 | G.bulloides | 5845 | 69 | ETH-Zurich | Gas |
| 23 | ETH-76339.3.1 | G.bulloides | 6520 | 70 | ETH-Zurich | Gas |
| 25 | UBA-36792 | Benthics | 6245 | 28 | 14C Chrono centre Belfast | Graphite |
| 25 | UBA-36793 | G.ruber | 6176 | 28 | 14C Chrono centre Belfast | Graphite |
| 35 | UBA-36796 | Benthics | 8668 | 32 | 14C Chrono centre Belfast | Graphite |
| 35 | ETH-76342.1.1 | mixed benthic | 8703 | 86 | ETH-Zurich | Gas |
| 35 | ETH-76342.3.1 | mixed benthic | 9067 | 88 | ETH-Zurich | Gas |
| 35 | UBA-36794 | G.ruber | 8471 | 33 | 14C Chrono centre Belfast | Graphite |
| 35 | ETH-76341.1.1 | G.bulloides | 9372 | 89 | ETH-Zurich | Gas |
| 35 | ETH-76341.3.1 | G.bulloides | 9320 | 82 | ETH-Zurich | Gas |
| 39 | ETH-76344.1.1 | mixed benthic | 10226 | 85 | ETH-Zurich | Gas |
| 39 | ETH-76344.3.1 | mixed benthic | 9636 | 83 | ETH-Zurich | Gas |
| 39 | ETH-76515 | G.bulloides | 10340 | 40 | ETH-Zurich | Gas |
| 41 | ETH-76346.1.1 | mixed benthic | 10412 | 86 | ETH-Zurich | Gas |
| 41 | ETH-76346.3.1 | mixed benthic | 10841 | 84 | ETH-Zurich | Gas |
| 41 | ETH-76516 | mixed benthic | 10669 | 37 | ETH-Zurich | Graphite |
| 41 | ETH-76345.3.1 | G.bulloides | 11501 | 94 | ETH-Zurich | Gas |
| 45 | ETH-76348.1.1 | mixed benthic | 11285 | 96 | ETH-Zurich | Gas |
| 45 | ETH-76348.3.1 | mixed benthic | 11293 | 92 | ETH-Zurich | Gas |
| 45 | ETH-76517 | mixed benthic | 11575 | 45 | ETH-Zurich | Graphite |
| 45 | ETH-76347.1.1 | G.bulloides | 11749 | 97 | ETH-Zurich | Gas |
| 45 | ETH-76347.3.1 | G.bulloides | 11482 | 94 | ETH-Zurich | Gas |
| 50 | ETH-76350.1.1 | mixed benthic | 11899 | 93 | ETH-Zurich | Gas |
| 50 | ETH-76350.3.1 | mixed benthic | 11807 | 98 | ETH-Zurich | Gas |
| 50 | ETH-76518 | mixed benthic | 11938 | 44 | ETH-Zurich | Graphite |
| 50 | ETH-76349.1.1 | G.bulloides | 11913 | 95 | ETH-Zurich | Gas |
| 50 | ETH-76349.3.1 | G.bulloides | 11811 | 96 | ETH-Zurich | Gas |
| 52 | ETH-76352.1.1 | mixed benthic | 11559 | 96 | ETH-Zurich | Gas |
| 52 | ETH-76352.3.1 | mixed benthic | 12261 | 97 | ETH-Zurich | Gas |
| 52 | ETH-76351.1.1 | G.bulloides | 12460 | 109 | ETH-Zurich | Gas |
| 52 | ETH-76351.3.1 | G.bulloides | 12675 | 96 | ETH-Zurich | Gas |
| 55 | ETH-76354.1.1 | mixed benthic | 11632 | 91 | ETH-Zurich | Gas |
| 55 | ETH-76354.3.1 | mixed benthic | 11898 | 98 | ETH-Zurich | Gas |
| 55 | ETH-76353.1.1 | G.bulloides | 12563 | 105 | ETH-Zurich | Gas |
| 55 | ETH-76519 | G.bulloides | 12154 | 45 | ETH-Zurich | Graphite |
| 61 | ETH-76356.1.1 | mixed benthic | 13110 | 104 | ETH-Zurich | Gas |
| 61 | ETH-76356.3.1 | mixed benthic | 13163 | 107 | ETH-Zurich | Gas |
| 61 | ETH-76355.1.1 | G.bulloides | 13548 | 113 | ETH-Zurich | Gas |
| 61 | ETH-76355.3.1 | G.bulloides | 13782 | 105 | ETH-Zurich | Gas |
| 65 | ETH-76524 | N.Pachyderma s | 13918 | 50 | ETH-Zurich | Graphite |
| 67 | ETH-76525 | N.Pachyderma s | 14956 | 54 | ETH-Zurich | Graphite |
| 69 | ETH-76526 | N.Pachyderma s | 14333 | 50 | ETH-Zurich | Graphite |
| 75 | ETH-76358.1.1 | mixed benthic | 16805 | 158 | ETH-Zurich | Gas |
| 75 | ETH-76358.3.1 | mixed benthic | 16627 | 155 | ETH-Zurich | Gas |
| 75 | ETH-76357.1.1 | N.Pachyderma s | 15163 | 123 | ETH-Zurich | Gas |
| 75 | ETH-76357.3.1 | N.Pachyderma s | 15471 | 126 | ETH-Zurich | Gas |
| 79 | ETH-76360.1.1 | mixed benthic | 16467 | 143 | ETH-Zurich | Gas |
| 79 | ETH-76359.1.1 | N.Pachyderma s | 15757 | 132 | ETH-Zurich | Gas |
| 79 | ETH-76359.3.1 | N.Pachyderma s | 15634 | 127 | ETH-Zurich | Gas |
| 81 | ETH-76362.1.1 | mixed benthic | 17915 | 159 | ETH-Zurich | Gas |
| 81 | ETH-76362.3.1 | mixed benthic | 17302 | 159 | ETH-Zurich | Gas |
| 81 | ETH-76520 | G.bulloides | 16677 | 56 | ETH-Zurich | Graphite |
| 85 | ETH-76364.3.1 | mixed benthic | 18515 | 168 | ETH-Zurich | Gas |
| 85 | ETH-76363.1.1 | G.bulloides | 17400 | 156 | ETH-Zurich | Gas |
| 85 | ETH-76363.3.1 | G.bulloides | 17398 | 151 | ETH-Zurich | Gas |
| 91 | ETH-76366.1.1 | mixed benthic | 19470 | 182 | ETH-Zurich | Gas |
| 91 | ETH-76366.3.1 | mixed benthic | 19143 | 183 | ETH-Zurich | Gas |
| 91 | ETH-76365.1.1 | G.bulloides | 18515 | 168 | ETH-Zurich | Gas |
| 91 | ETH-76365.3.1 | G.bulloides | 18432 | 164 | ETH-Zurich | Gas |
| 96 | ETH-76368.1.1 | mixed benthic | 19856 | 187 | ETH-Zurich | Gas |
| 96 | ETH-76368.3.1 | mixed benthic | 19692 | 187 | ETH-Zurich | Gas |
| 96 | ETH-76367.1.1 | G.bulloides | 18972 | 172 | ETH-Zurich | Gas |
| 96 | ETH-76367.3.1 | G.bulloides | 18884 | 167 | ETH-Zurich | Gas |
| 104 | ETH-76369.1.1 | mixed benthic | 20663 | 202 | ETH-Zurich | Gas |
| 104 | ETH-76370.1.1 | G.bulloides | 19467 | 198 | ETH-Zurich | Gas |
| 104 | ETH-76521 | G.bulloides | 19014 | 68 | ETH-Zurich | Graphite |
| 113 | ETH-76372.1.1 | mixed benthic | 21117 | 214 | ETH-Zurich | Gas |
| 113 | ETH-76522 | G.bulloides | 20322 | 73 | ETH-Zurich | Graphite |
| 117 | ETH-76374.1.1 | mixed benthic | 21268 | 216 | ETH-Zurich | Gas |
| 117 | ETH-76373.1.1 | G.bulloides | 20823 | 213 | ETH-Zurich | Gas |
| 117 | ETH-76373.3.1 | G.bulloides | 21226 | 211 | ETH-Zurich | Gas |
| 119 | ETH-76377.1.1 | mixed benthic | 21595 | 224 | ETH-Zurich | Gas |
| 119 | ETH-76375.1.1 | G.bulloides | 20954 | 218 | ETH-Zurich | Gas |
| 119 | ETH-76375.3.1 | G.bulloides | 21023 | 206 | ETH-Zurich | Gas |
| 120 | ETH-76376.1.1 | G.bulloides | 20806 | 207 | ETH-Zurich | Gas |
| 120 | ETH-76376.3.1 | G.bulloides | 20720 | 201 | ETH-Zurich | Gas |
| 120 | ETH-76527 | G.bulloides | 20601 | 74 | ETH-Zurich | Graphite |
| 127 | ETH-76378.1.1 | mixed benthic | 22738 | 247 | ETH-Zurich | Gas |
| 127 | ETH-76379.1.1 | G.bulloides | 22242 | 233 | ETH-Zurich | Gas |
| 127 | ETH-76523 | G.bulloides | 21429 | 85 | ETH-Zurich | Graphite |
| 131 | ETH-76381.1.1 | mixed benthic | 23207 | 258 | ETH-Zurich | Gas |
| 131 | ETH-76381.3.1 | mixed benthic | 23072 | 257 | ETH-Zurich | Gas |
| 131 | ETH-76380.1.1 | G.bulloides | 22454 | 249 | ETH-Zurich | Gas |
| 131 | ETH-76380.3.1 | G.bulloides | 21793 | 224 | ETH-Zurich | Gas |
| 135 | ETH-76383.1.1 | mixed benthic | 21097 | 220 | ETH-Zurich | Gas |
| 135 | ETH-76383.3.1 | mixed benthic | 24185 | 292 | ETH-Zurich | Gas |
| 135 | ETH-76382.1.1 | G.bulloides | 23044 | 260 | ETH-Zurich | Gas |
| 135 | ETH-76382.3.1 | G.bulloides | 22757 | 245 | ETH-Zurich | Gas |

**Table S3: Standard deviations between replicated measurements (gas and graphite) per level**

“gs” stands for gas and “gr” stands for graphite

| **Depth (cm)** | **Species** | **Standard deviation**  **(y -1** **)** | **description** |
| --- | --- | --- | --- |
| 3 | G.bulloides (gs)- G.ruber (gr) | 156 | 2 gs (ETH) 1 gr (Belfast) |
| 3 | Mixed benthic | 354 | 2 gs (ETH) 1gr (Belfast) |
| 9 | G.bulloides (gs)- G.ruber (gr) | 132 | 2 gs (ETH) 1 gr (Belfast) |
| 9 | Mixed benthic | 209 | 1 gs (ETH) 1 gr (Belfast) |
| 17 | G.bulloides (gs)- G.ruber (gr) | 159 | 2 gs (ETH) 1 gr (Belfast) |
| 17 | Mixed benthic | 276 | 2 gs (ETH) 1 gr (Belfast) |
| 23 | G.bulloides (gs)- G.ruber (gr) | 476 | 2 gs (ETH) 1 gr (Belfast) |
| 23 | Mixed benthic | 640 | 2 gs (ETH) 1 gr (Belfast) |
| 35 | G.bulloides (gs)- G.ruber (gr) | 506 | 2 gs (ETH) 1 gr (Belfast) |
| 41 | Mixed benthic | 216 | 2 gs (ETH) 1 gr (ETH) |
| 45 | Mixed benthic | 165 | 2 gs (ETH) 1 gr (ETH) |
| 50 | Mixed benthic | 67 | 2 gs (ETH) 1 gr (ETH) |
| 55 | G.bulloides (gs) -G.bulloides (gr) | 289 | 1 gs (ETH) 1 gr (ETH) |
| 104 | G.bulloides (gs) -G.bulloides (gr) | 320 | 1 gs (ETH) 1 gr (ETH) |
| 120 | G.bulloides (gs) -G.bulloides (gr) | 75 | 2 gs (ETH) 1 gr (ETH) |
| 127 | G.bulloides (gs) -G.bulloides (gr) | 575 | 1 gs (ETH) 1 gr (ETH) |

**Table S4: SU90-08 benthic δ13C and δ18O measurements**

See text S3 for measurement description.

| **Depth (cm)** | **Benthic δ13C**  **(‰ PDB)** | **Benthic δ18O**  **(‰ PDB)** |
| --- | --- | --- |
| 1 | 1.33 | 2.42 |
| 3 | 1.03 | 2.48 |
| 3 | 1.28 | 2.29 |
| 5 | 1.28 | 2.47 |
| 7 | 1.26 | 2.48 |
| 9 | 1.26 | 2.43 |
| 10 | 1.27 | 2.67 |
| 11 | 1.17 | 2.46 |
| 15 | 1.16 | 2.41 |
| 17 | 1.04 | 2.38 |
| 17 | 0.92 | 2.38 |
| 19 | 1.03 | 2.41 |
| 19 | 1.19 | 2.29 |
| 20 | 1.05 | 2.37 |
| 21 | 1.08 | 2.58 |
| 23 | 1.24 | 2.46 |
| 25 | 1.29 | 2.52 |
| 27 | 1.28 | 2.43 |
| 29 | 1.16 | 2.50 |
| 30 | 1.14 | 2.49 |
| 31 | 0.96 | 2.61 |
| 33 | 1.26 | 2.63 |
| 33 | 1.20 | 2.55 |
| 35 | 1.24 | 2.51 |
| 37 | 1.20 | 2.76 |
| 39 | 1.15 | 2.56 |
| 40 | 1.08 | 2.68 |
| 40 | 1.16 | 2.78 |
| 41 | 1.01 | 2.72 |
| 43 | 0.90 | 3.05 |
| 43 | 1.09 | 2.72 |
| 45 | 1.04 | 2.55 |
| 45 | 1.10 | 2.81 |
| 47 | 1.13 | 3.28 |
| 47 | 0.94 | 3.04 |
| 49 | 1.17 | 3.00 |
| 51 | 1.08 | 3.07 |
| 53 | 1.15 | 3.27 |
| 53 | 0.98 | 3.14 |
| 55 | 1.16 | 3.36 |
| 57 | 1.12 | 3.23 |
| 59 | 0.94 | 3.22 |
| 61 | 1.00 | 3.34 |
| 63 | 0.79 | 3.40 |
| 63 | 0.70 | 3.39 |
| 65 | 1.13 | 3.37 |
| 65 | 1.11 | 3.42 |
| 65 | 0.78 | 3.04 |
| 69 | 0.24 | 3.63 |
| 71 | 0.20 | 4.05 |
| 71 | 0.60 | 4.24 |
| 73 | 0.46 | 4.03 |
| 73 | 0.36 | 4.09 |
| 75 | 0.27 | 4.22 |
| 77 | 0.49 | 4.05 |
| 79 | 0.32 | 4.56 |
| 81 | 0.72 | 4.47 |
| 83 | 0.61 | 4.32 |
| 85 | 0.40 | 4.44 |
| 87 | 0.16 | 4.34 |
| 89 | 0.57 | 4.39 |
| 91 | 0.45 | 4.23 |
| 93 | 0.31 | 4.31 |
| 94 | 0.36 | 4.53 |
| 96 | 0.39 | 4.31 |
| 97 | 0.32 | 4.28 |
| 99 | 0.33 | 4.39 |
| 101 | 0.42 | 4.30 |
| 103 | 0.20 | 4.24 |
| 105 | 0.56 | 3.95 |
| 105 | 0.76 | 4.20 |
| 107 | 0.19 | 4.31 |
| 109 | 0.27 | 4.24 |
| 111 | 0.38 | 4.32 |
| 113 | 0.64 | 4.31 |
| 115 | 0.67 | 4.40 |
| 117 | 0.43 | 4.27 |
| 119 | 0.61 | 4.26 |
| 121 | 0.67 | 4.22 |
| 123 | 0.47 | 3.85 |
| 125 | 0.49 | 3.87 |
| 127 | 0.42 | 4.34 |
| 129 | 0.45 | 4.29 |
| 129 | 0.43 | 4.11 |
| 131 | 0.54 | 4.25 |
| 133 | 0.36 | 4.31 |
| 135 | 0.51 | 4.35 |
| 137 | 0.41 | 4.32 |
| 139 | 0.44 | 4.27 |
| 141 | 0.60 | 4.23 |
| 143 | 0.75 | 4.31 |
| 145 | 0.61 | 4.35 |
| 147 | 0.66 | 4.08 |
| 149 | 0.67 | 4.06 |
| 151 | 0.77 | 4.23 |
| 151 | 1.10 | 4.22 |
| 153 | 1.16 | 4.18 |
| 155 | 0.87 | 4.13 |
| 157 | 0.93 | 4.17 |
| 159 | 0.83 | 4.10 |
| 161 | 1.02 | 4.35 |
| 161 | 1.12 | 4.25 |
| 163 | 1.01 | 4.18 |
| 165 | 0.86 | 4.18 |
| 167 | 0.80 | 4.14 |
| 169 | 1.09 | 4.12 |
| 171 | 1.33 | 4.05 |
| 173 | 1.24 | 4.09 |
| 175 | 0.97 | 3.99 |
| 177 | 1.03 | 3.95 |
| 179 | 1.14 | 3.85 |
| 181 | 1.03 | 3.93 |
| 183 | 1.15 | 4.03 |
| 185 | 1.04 | 3.89 |
| 187 | 1.23 | 3.92 |
| 189 | 1.29 | 3.81 |
| 191 | 1.06 | 3.70 |
| 191 | 1.18 | 3.85 |
| 193 | 1.26 | 3.70 |
| 195 | 0.62 | 3.71 |
| 195 | 0.93 | 3.52 |
| 197 | 1.11 | 3.69 |
| 199 | 1.22 | 3.72 |
| 205 | 0.86 | 3.99 |
| 207 | 1.10 | 4.02 |
| 209 | 1.24 | 3.90 |
| 209 | 1.34 | 3.97 |
| 211 | 1.23 | 3.89 |
| 213 | 1.32 | 4.01 |
| 215 | 1.35 | 3.97 |
| 217 | 1.13 | 3.98 |
| 219 | 1.28 | 3.92 |
| 221 | 1.18 | 3.92 |
| 223 | 1.21 | 3.87 |
| 225 | 1.08 | 3.95 |
| 227 | 1.19 | 3.79 |
| 227 | 1.25 | 4.14 |
| 229 | 0.90 | 3.88 |
| 231 | 1.32 | 3.96 |
| 233 | 1.08 | 3.84 |
| 235 | 1.26 | 3.82 |
| 237 | 1.12 | 3.71 |
| 239 | 1.00 | 3.80 |

**References**

Pourmand A, Dauphas N, Ireland TJ. 2012. A novel extraction chromatography and mc-icp-ms technique for rapid analysis of ree, sc and y: Revising ci-chondrite and post-archean australian shale (paas) abundances. Chemical Geology. 291:38-54.

Skinner LC, Sadekov A, Brandon M, Greaves M, Plancherel Y, de La Fuente M, Gottschalk J, Souanef-Ureta S, Sevilgen DS, Scrivner AE. 2019. Rare earth elements in early-diagenetic foraminifer ‘coatings’: Pore-water controls and potential palaeoceanographic applications. Geochimica et Cosmochimica Acta. 245:118-132.

Taylor SR, McLennan SM. 1985. The continental crust: Its composition and evolution.

Tostevin R, Shields GA, Tarbuck GM, He T, Clarkson MO, Wood RA. 2016. Effective use of cerium anomalies as a redox proxy in carbonate-dominated marine settings. Chemical Geology. 438:146-162.
